# Supplementary material
Source: PubMed Central journal article supplement (PMC3663428)
Supplement: supp_blood-2013-02-486035_blood-2013-02-486035-1.pdf [file supp_blood-2013-02-486035_blood-2013-02-486035-1.pdf]

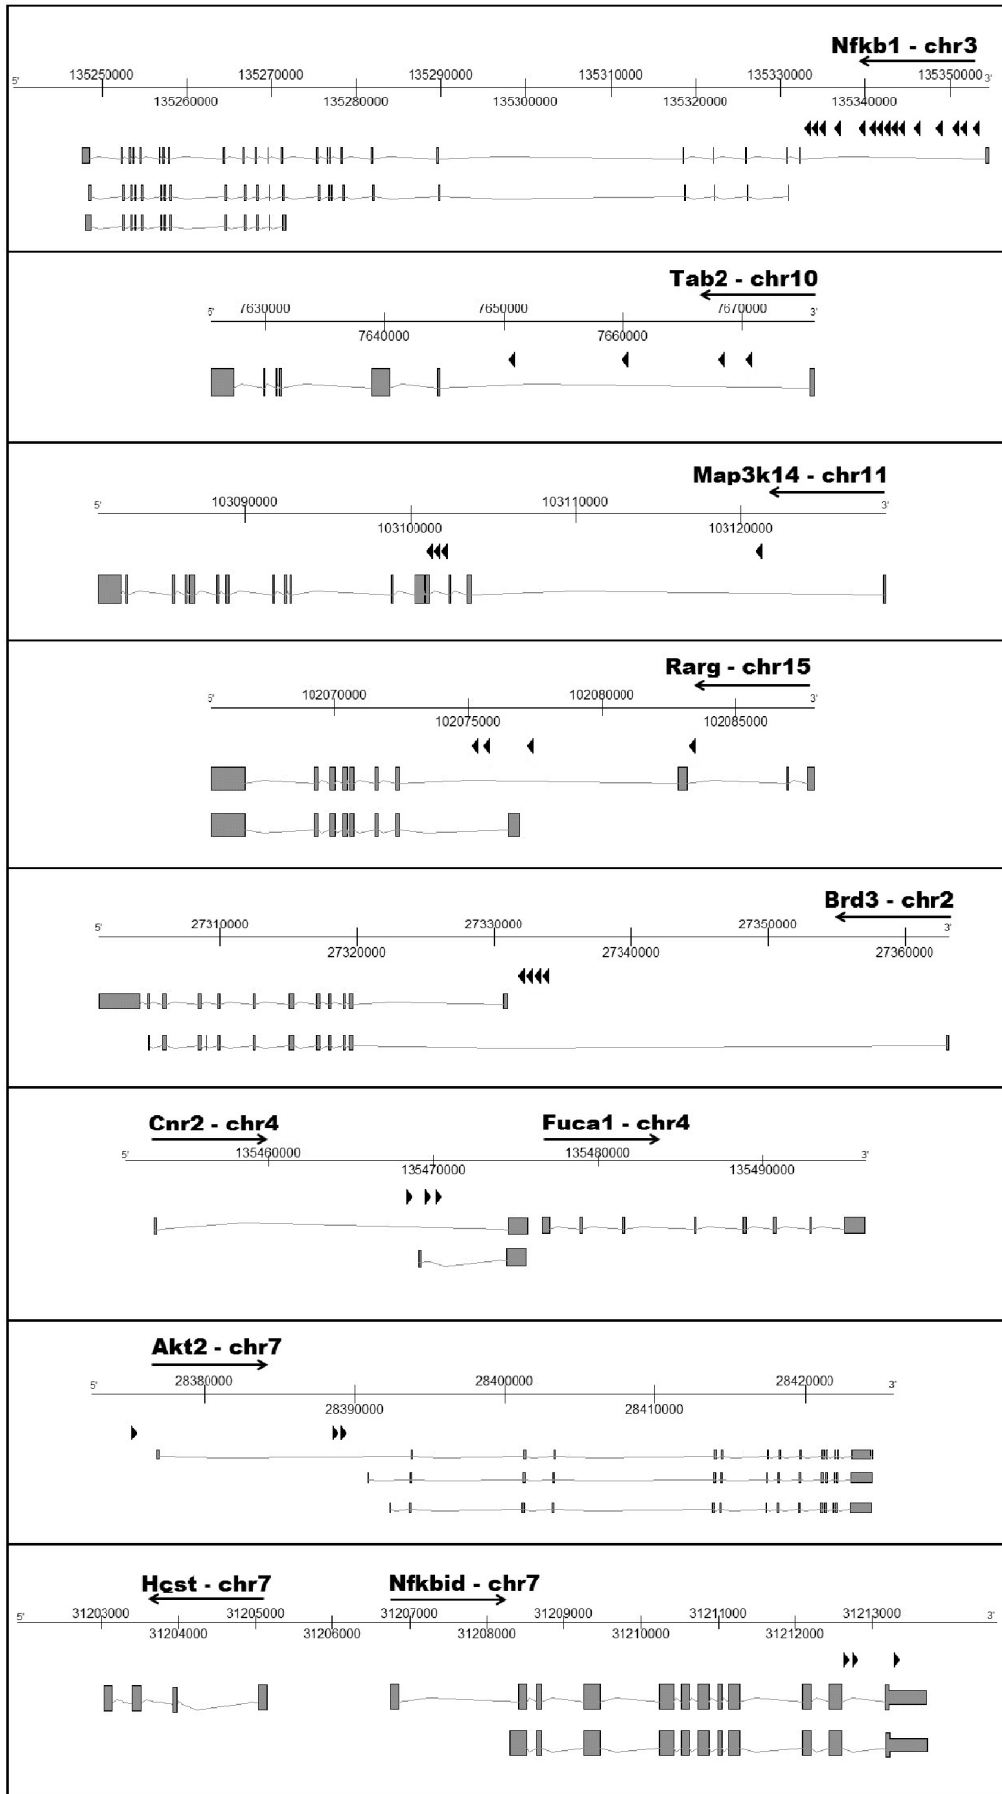

**Suppl. Fig. 1.** Positions of transposon insertions within affected genes (mouse genome assembly mm9). Locations and directions of transposon insertions are shown as solid arrowheads. Only major transcripts are shown.
